# Supplementary material
Source: Research Square preprint supplement (doi:10.21203/rs.3.rs-9259996/v1)
Supplement: Supplementary file 3 [file 7e6ee26d2436f9b66ee68788.docx]

| **Supplementary Table 1. Weighted Bivariate Associations Between Sociodemographic Characteristics and Diagnosed Mental Health Outcomes Among U.S. Children and Adolescents, NSCH 2018–2019** | | | | | | | | | |
| --- | --- | --- | --- | --- | --- | --- | --- | --- | --- |
|  | **Anxiety** | | | **Depression** | | | **ADHD** | | |
| **Variable N (%)** | **No Anxiety Pop. (%)** | **Yes Anxiety Pop. (%)** | **χ² (p)** | **No Depression Pop. (%)** | **Yes Depression Pop. (%)** | **χ² (p)** | **No ADHD Pop. (%)** | **Yes ADHD Pop. (%)** | **χ² (p)** |
| **Gender**  N = 99,130,842 |  |  | **.001***** |  |  | **.003**** |  |  | **<.001***** |
| Male | 45,147,722 (89.0%) | 5,590,134 (11.0%) |  | 48,019,325 (94.8%) | 2,660,020 (5.2%) |  | 42,468,921 (84.4%) | 7,876,997 (15.6%) |  |
| Female | 42,168,213 (87.1%) | 6,224,773 (12.9%) |  | 45,249,555 (93.3%) | 3,224,564 (6.7%) |  | 44,591,840 (92.9%) | 3,425,385 (7.1%) |  |
| **Age Group**  N = 99,130,842 |  |  | **<.001***** |  |  | **<.001***** |  |  | **<.001***** |
| 6–11 years | 44,587,068 (90.6%) | 4,605,239 (9.4%) |  | 47,913,295 (97.4%) | 1,302,680 (2.6%) |  | 43,913,050 (90.0%) | 4,895,183 (10.0%) |  |
| 12–17 years | 42,728,867 (85.6%) | 7,209,668 (14.4%) |  | 45,355,585 (90.8%) | 4,581,904 (9.2%) |  | 43,147,711 (87.1%) | 6,407,198 (12.9%) |  |
| **Race/Ethnicity**  N = 99,130,842 |  |  | **<.001***** |  |  | **.029*** |  |  | **<.001***** |
| Hispanic | 23,583,896 (90.6%) | 2,436,062 (9.4%) |  | 24,606,735 (94.3%) | 1,488,212 (5.7%) |  | 23,519,080 (91.2%) | 2,278,717 (8.8%) |  |
| White, Non-Hispanic | 41,566,900 (85.0%) | 7,351,044 (15.0%) |  | 45,663,035 (93.4%) | 3,225,387 (6.6%) |  | 42,198,704 (86.8%) | 6,434,944 (13.2%) |  |
| Black, Non-Hispanic | 12,474,444 (91.6%) | 1,139,329 (8.4%) |  | 12,851,666 (94.7%) | 717,559 (5.3%) |  | 11,654,005 (86.8%) | 1,774,417 (13.2%) |  |
| Other/Multi-Racial | 9,690,695 (91.6%) | 888,471 (8.4%) |  | 10,147,442 (95.7%) | 453,426 (4.3%) |  | 9,688,973 (92.2%) | 814,303 (7.8%) |  |
| **Poverty Level of Household**  N = 99,130,842 |  |  | **.645**ns |  |  | **<.001***** |  |  | **.020*** |
| 0–99% FPL | 16,782,440 (88.0%) | 2,289,387 (12.0%) |  | 17,594,382 (92.2%) | 1,480,744 (7.8%) |  | 16,440,089 (87.0%) | 2,460,715 (13.0%) |  |
| 100–199% FPL | 18,696,365 (87.8%) | 2,585,874 (12.2%) |  | 19,909,108 (93.2%) | 1,450,826 (6.8%) |  | 18,452,272 (87.9%) | 2,546,055 (12.1%) |  |
| 200–399% FPL | 24,592,466 (87.7%) | 3,440,336 (12.3%) |  | 26,574,379 (94.9%) | 1,430,639 (5.1%) |  | 24,793,107 (89.0%) | 3,076,295 (11.0%) |  |
| 400% FPL or greater | 27,244,664 (88.6%) | 3,499,310 (11.4%) |  | 29,191,011 (95.0%) | 1,522,375 (5.0%) |  | 27,375,293 (89.5%) | 3,219,316 (10.5%) |  |
| **Parental Education Level**  N = 99,130,842 |  |  | **.014*** |  |  | **.002**** |  |  | **<.001***** |
| Less than high school | 9,816,273 (90.7%) | 1,006,978 (9.3%) |  | 10,044,533 (92.8%) | 777,082 (7.2%) |  | 9,593,230 (91.0%) | 952,327 (9.0%) |  |
| High school or GED | 17,068,561 (89.0%) | 2,117,285 (11.0%) |  | 17,978,050 (93.7%) | 1,218,444 (6.3%) |  | 16,425,043 (86.9%) | 2,482,090 (13.1%) |  |
| Some college or technical school | 18,886,711 (86.7%) | 2,889,605 (13.3%) |  | 20,254,989 (92.6%) | 1,625,785 (7.4%) |  | 18,760,312 (86.3%) | 2,988,192 (13.7%) |  |
| College degree or higher | 41,544,391 (87.7%) | 5,801,039 (12.3%) |  | 44,991,308 (95.2%) | 2,263,274 (4.8%) |  | 42,282,176 (89.7%) | 4,879,772 (10.3%) |  |
| *Note.* Weighted population size estimates and column percentages from NSCH 2018–2019 Complex Samples analysis (IBM SPSS v29), applying NSCH sampling weights, strata, and primary sampling units. Pop. = weighted population size estimate. (%) = weighted column percent (prevalence within subgroup). χ² = Rao-Scott design-adjusted chi-square test of independence. *p < .05. **p < .01. ***p < .001. ns = not significant (p ≥ .05). FPL = Federal Poverty Level. | | | | | | | | | |
