# Supplementary material
Source: Research Square preprint supplement (doi:10.21203/rs.3.rs-9259996/v1)

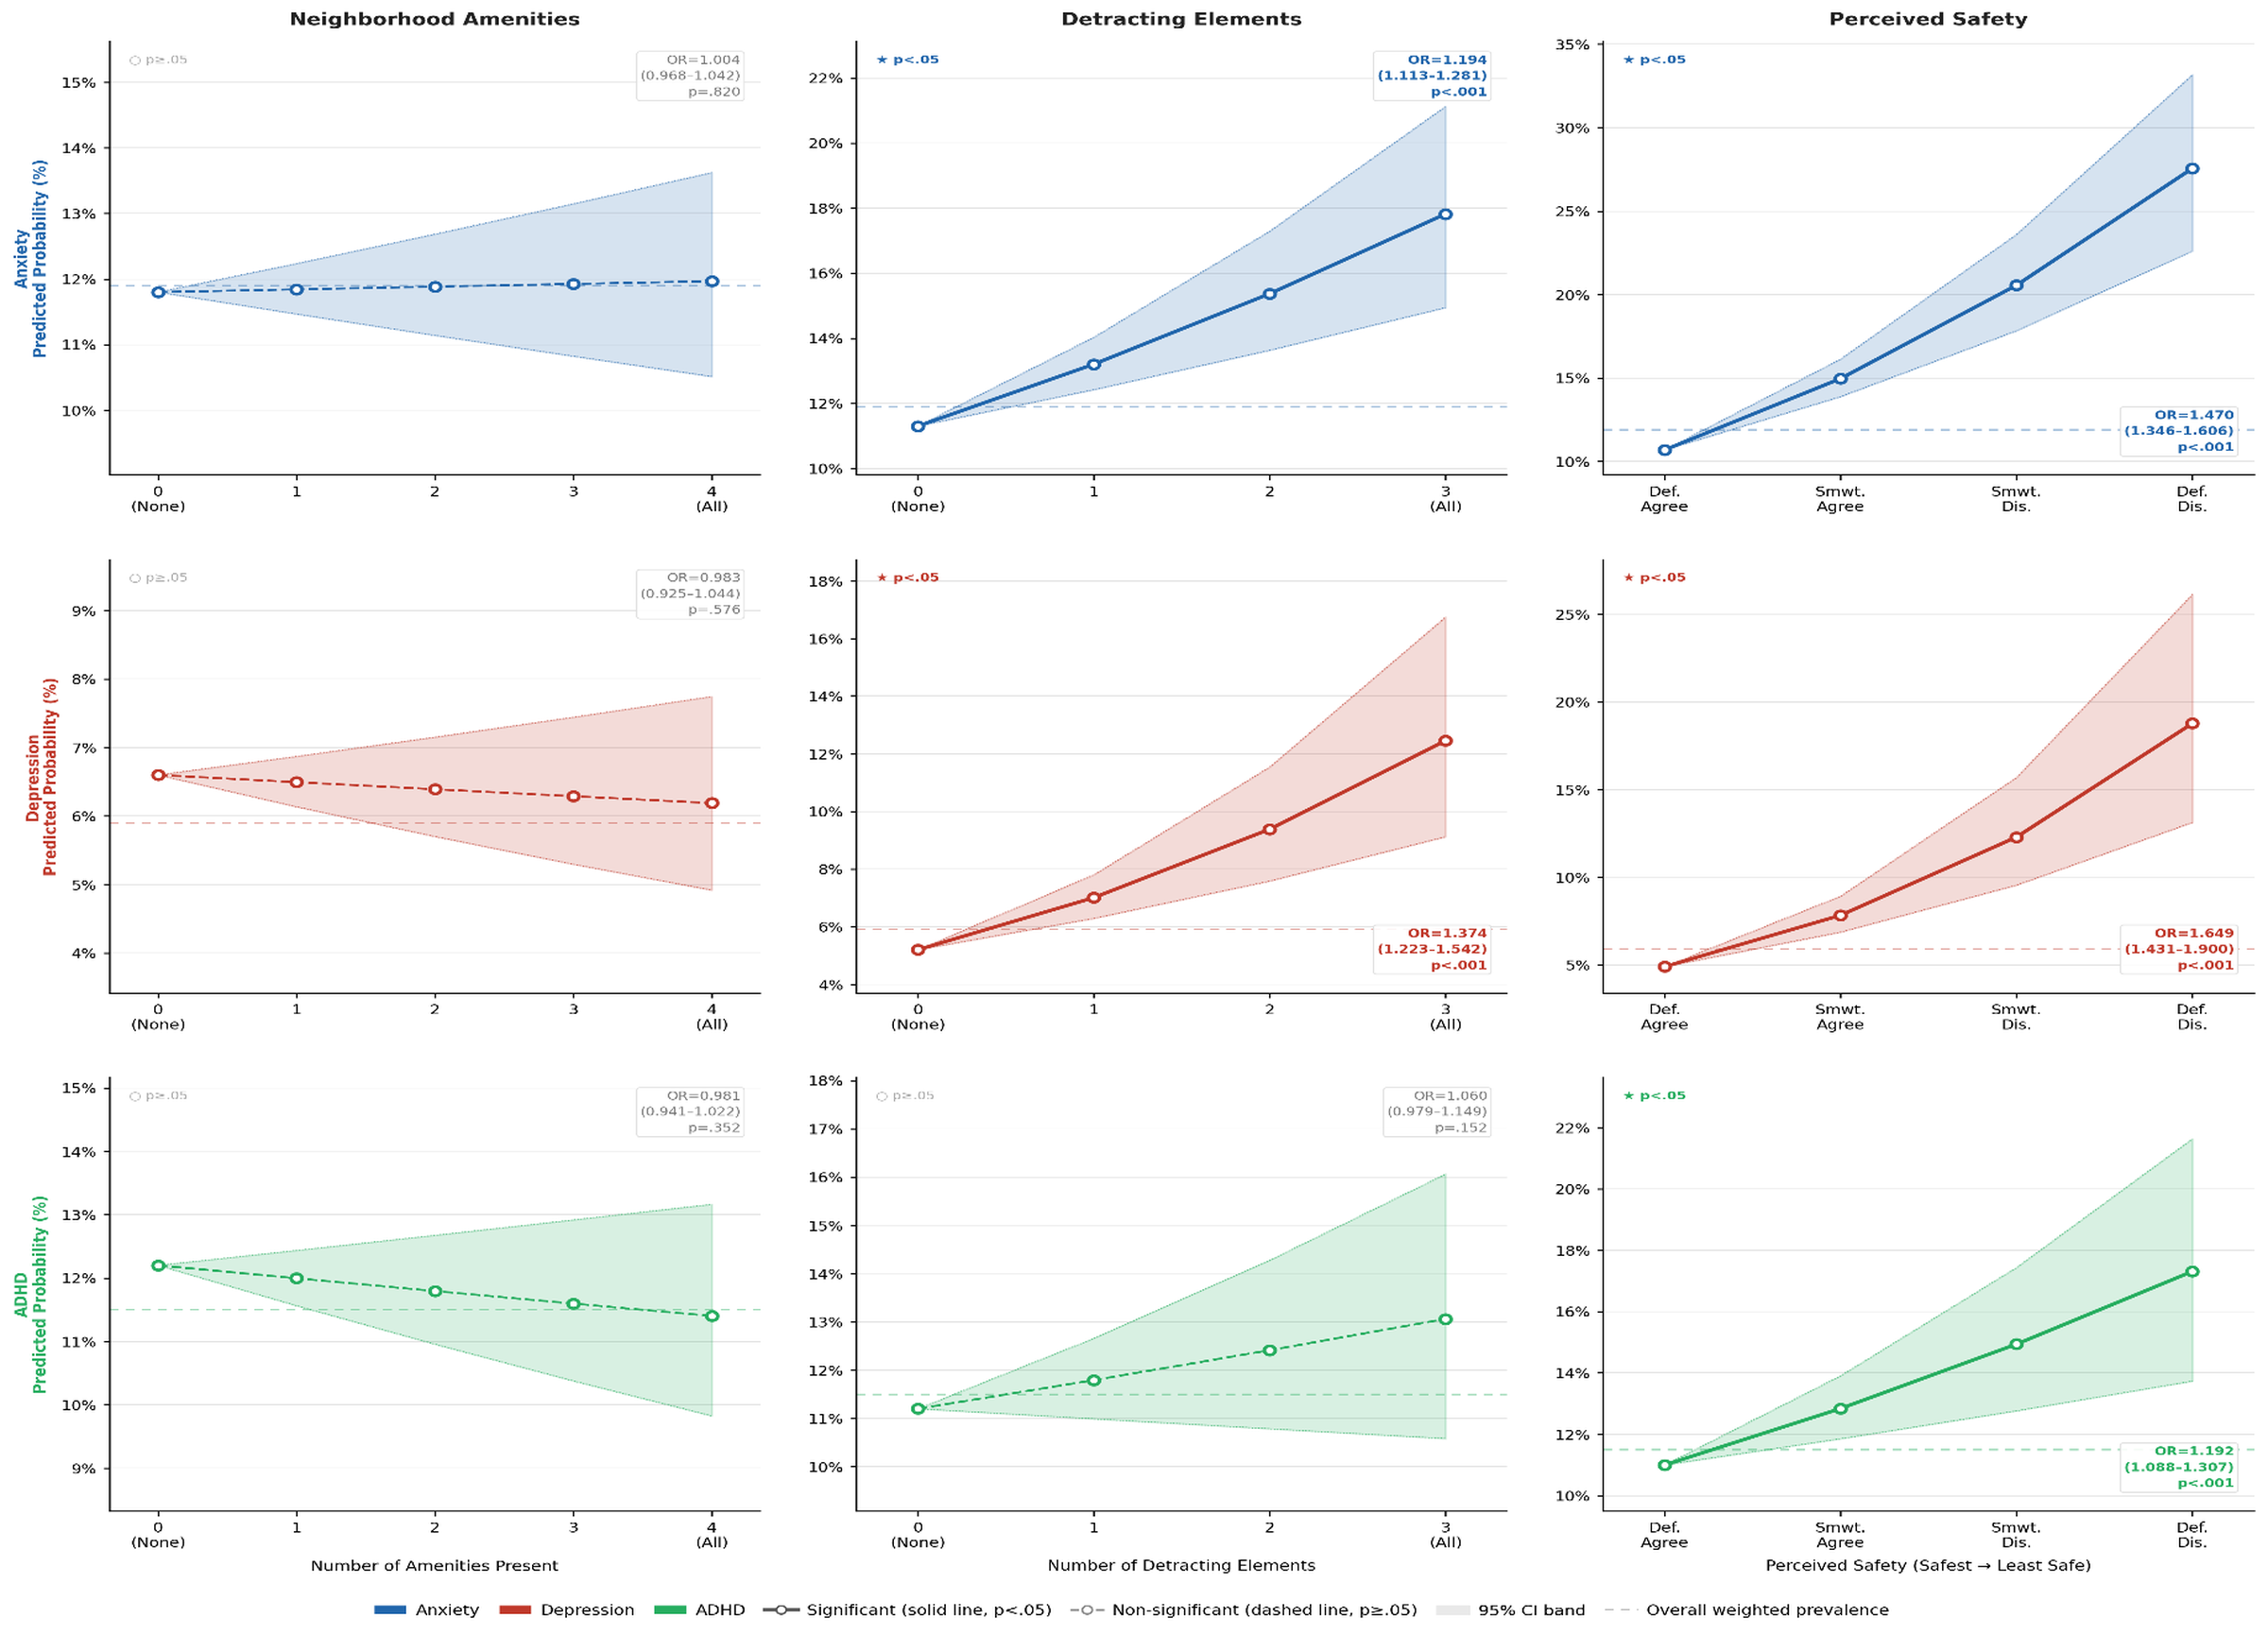

Supplement: Supplementary file 1 [file 1fd975b633d38bac29d52e1f.docx]

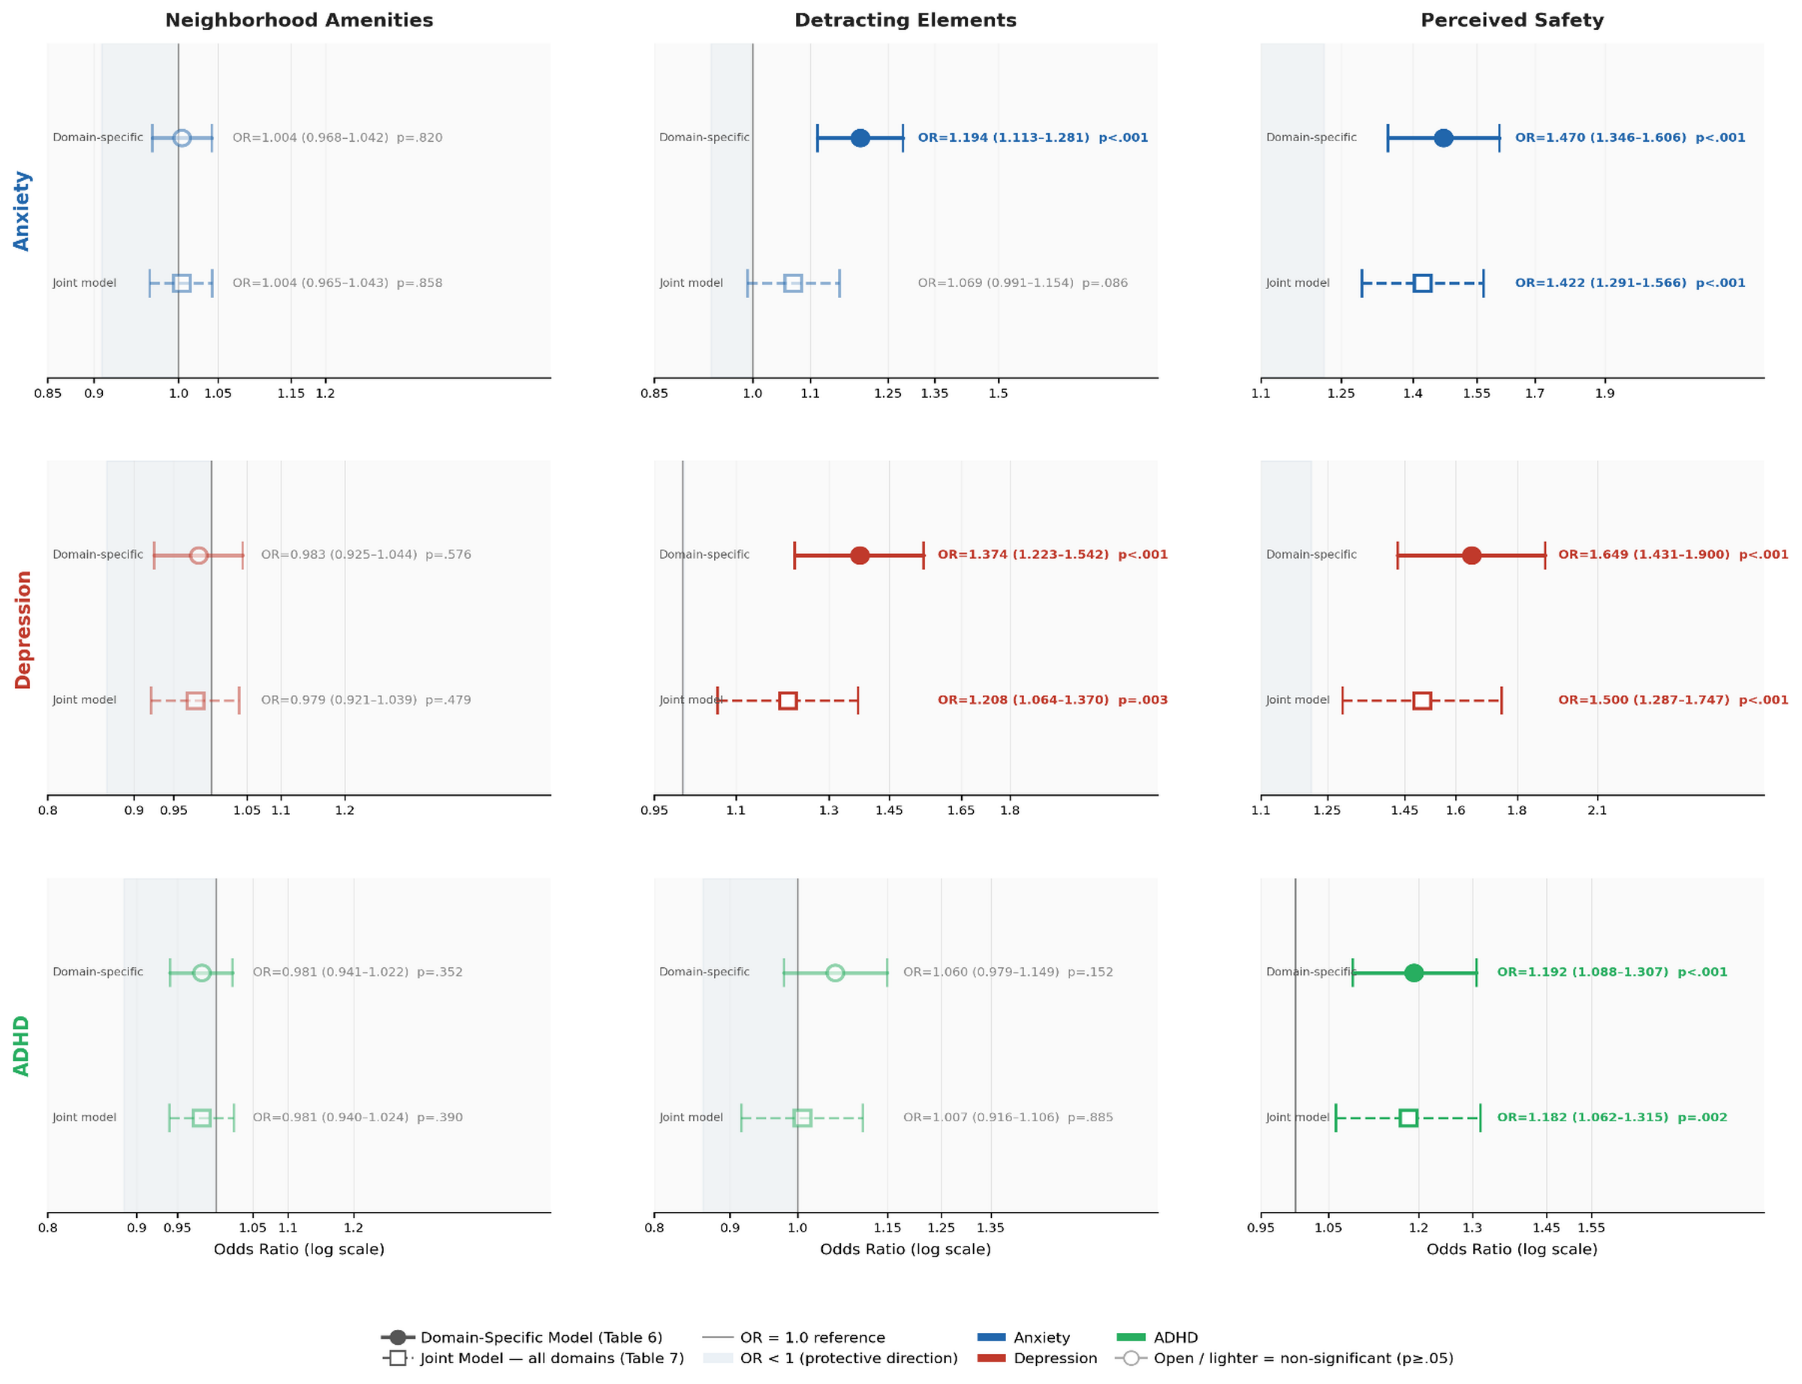

Supplement: Supplementary file 2 [file 4d347aa76bb73cb333d0124c.docx]
